# Supplementary material
Source: PubMed Central journal article supplement (PMC3659942)
Supplement: supp_2011.057067_2011_057067-Contributions.pdf [file supp_2011.057067_2011_057067-Contributions.pdf]

**Manuscript no. HAEMATOL /2011/057067 entitled: “PML-RARa cooperates with Sox4 in acute myeloid leukemia development in mice”**

**Authors: Nader Omidvar, Mei Lin Maunakea, Letetia Jones, Sabina Sevcikova, Bin Yin, Karen L. Himmel, Thelma R. Tennant, Michelle M. Le Beau, David A. Largaespada and Scott C. Kogan**

**Information about the contributions of each person named as having participated in the study**

**1) Guarantor(s), i.e., person(s) who is (are) responsible for the integrity of the work as a whole:**

- Nader Omidvar, Department of Haematology, School of Medicine, Cardiff University, Cardiff, CF14 4XN, UK
- Scott C Kogan, Helen Diller Family Comprehensive Cancer Center and Department of Laboratory Medicine, University of California San Francisco, CA, 94143

According to the International Committee of Medical Journal Editors (ICMJE) ([http://www.icmje.org/ethical\\_1author.html](http://www.icmje.org/ethical_1author.html)): “Authorship credit should be based on: 1) substantial contributions to conception and design, acquisition of data, or analysis and interpretation of data; 2) drafting the article or revising it critically for important intellectual content; and 3) final approval of the version to be published. Authors should meet conditions 1, 2, and 3 ..... Acquisition of funding, collection of data, or general supervision of the research group alone does not constitute authorship”.

**The guarantors of this manuscript confirm that all persons designated as authors qualify for authorship, and that each author has participated sufficiently in the work to take public responsibility for appropriate portions of the content.**

**2) Authors who participated in the conception of the study:** Nader Omidvar, David A. Largaespada and Scott C. Kogan

**3) Design & Methods: The following authors were responsible for specific investigations:**

- Nader Omidvar, Michelle M. Le Beau, David A. Largaespada & Scott C. Kogan were responsible for designing the experiments.
- Nader Omidvar, Mei Lin Maunakea, Letetia Jones, Sabina Sevcikova, Bin Yin, Karen L. Himmel, Thelma R. Tennant were responsible for elaborating methods to perform the designed experiments.

**4) Results. The following authors were responsible for specific portions of the results, including figures and tables (please indicate the person responsible for each figure and each table):**

- Nader Omidvar, Mei Lin Maunakea, Letetia Jones, Sabina Sevcikova, Scott C Kogan were responsible for Table 1
- Nader Omidvar, Mei Lin Maunakea, Letetia Jones, Sabina Sevcikova, Scott C Kogan were responsible for Figure 1
- Nader Omidvar was responsible for Figure 2
- Thelma R. Tennant, Michelle M. Le Beau were responsible for Suppl Table 1
- Nader Omidvar was responsible for Suppl Figure 1

- Mei Lin Maunakea, Letetia Jones, Sabina Sevcikova were responsible for Suppl Figure 2
- Nader Omidvar was responsible for Suppl Figure 3
- Mei Lin Maunakea, Letetia Jones, Sabina Sevcikova were responsible for Suppl Figure 4
- Nader Omidvar was responsible for Suppl Figure 5

**5) Writing the manuscript. The following authors were responsible for writing the manuscript:**

Nader Omidvar, Michelle M. Le Beau, David A. Largaespada & Scott C. Kogan were responsible for writing the manuscript.

**6) Contributors Listed in Acknowledgments:**

The project described was supported by Award Number R01CA095274 from the National Cancer Institute, and LLS-SCOR (7015-09). The content is solely the responsibility of the authors and does not necessarily represent the official views of the National Cancer Institute or the National Institutes of Health. Scott C. Kogan was a scholar of the Leukemia and Lymphoma Society. Nader Omidvar is funded by Leukaemia and Lymphoma Research (UK). Bin Yin is supported by award number 2011CB933501 from the National Basic Research Program of China (973 Program). We thank The Mouse Pathology Core of the UCSF Helen Diller Family Comprehensive Cancer Center; Kirsten Copren and Lillian Edmondson from the Genome Analysis Core Facility, Helen Diller Family Comprehensive Cancer Center, University of California, San Francisco; Noel Lenny and James Downing from St Jude Children's Research Hospital Memphis; Neal Copeland and Nancy Jenkins for providing the Sox4 expressing retroviral vector; Tim Ley for helpful discussion; and Elizabeth M. Davis from the University of Chicago for expert assistance with the SKY analysis.
